# Supplementary material
Source: PubMed Central journal article supplement (PMC4290964)
Supplement: JCM.02187-14_zjm999093924so1.pdf [file JCM.02187-14_zjm999093924so1.pdf]

Table S1: Functional characteristics of putative genomic islands identified BJJ-01

| GI-Number | insert site     | Size (bp)       | IS/transposase/integrase                                                    | Pathogenicity/antibiotic resistance                                                                                                                                                                                    | Description/Functional Annotation                                                                                                                                                                                                                                                                            |
|-----------|-----------------|-----------------|-----------------------------------------------------------------------------|------------------------------------------------------------------------------------------------------------------------------------------------------------------------------------------------------------------------|--------------------------------------------------------------------------------------------------------------------------------------------------------------------------------------------------------------------------------------------------------------------------------------------------------------|
| GI-02     | VC1582-VC1588   | 3,584           | -                                                                           | -                                                                                                                                                                                                                      | Oxidative Stress Response; Superoxide dismutase [Cu-Zn] precursor (EC 1.15.1.1)/Catalase (EC 1.11.1.6)                                                                                                                                                                                                       |
| GI-03     | VC1747-VC1753   | 4,866           | -                                                                           | -                                                                                                                                                                                                                      | membrane protein;corresponds to STY3950 from Accession AL513382: Salmonella typhi CT18;Small-conductance mechanosensitive channel                                                                                                                                                                            |
| GI-04     | VC1819-VC1828   | 9,486           | -                                                                           | -                                                                                                                                                                                                                      | Carbohydrates (PTS system, Mannose Metabolism)                                                                                                                                                                                                                                                               |
| GI-10     | VCA0877-VCA0885 | 4,901           | -/-/integrase-related protein                                               | Non-hemolytic enterotoxin lytic component L1                                                                                                                                                                           |                                                                                                                                                                                                                                                                                                              |
| GI-19     | VCA0569-VCA0570 | 9,497           |                                                                             |                                                                                                                                                                                                                        |                                                                                                                                                                                                                                                                                                              |
| GI-47     | VC0809-VC0848   | 15824, 51529(c) | -                                                                           | -                                                                                                                                                                                                                      | Cell division protein ftsK; Exonuclease SbcC                                                                                                                                                                                                                                                                 |
| GI-58     | VCA0235-VCA0237 | 6,533           | -(Transposase)/-                                                            | -                                                                                                                                                                                                                      | Mu-like prophage FluMu I protein;Ferrichrome transport ATP-binding protein fhuC (TC 3.A.1.14.3);Iron (III) ABC transporter;Iron(III) dicitrate transport system permease protein fecD (TC 3.A.1.14.1);Isochorismatase (EC 3.3.2.1);LysR-family transcriptional regulator clustered with PA0057;              |
| GI-61     | VCA1064-VCA1067 | 6,421           | -                                                                           | -                                                                                                                                                                                                                      | Outer membrane lipoprotein-sorting protein; Predicted exporter of the RND superfamily; Transcriptional activator, LuxR/UhpA family of regulators                                                                                                                                                             |
| GI-64     | VC1560-VC1563   | 5,541           |                                                                             |                                                                                                                                                                                                                        | Adenylosuccinate synthetase (EC 6.3.4.4); LuxC; LuxD; LuxA; LuxB; LuxE; LuxG; extracellular solute-binding protein, family 3; 1-(5-phosphoribosyl)-5-[(5-phosphoribosylamino)methylideneamino]imidazole-4-carboxamide isomerase 2 (EC 5.3.1.16)                                                              |
| GI-67     | VCA0734-VCA0735 | 37,871          | -                                                                           | Iron aquisition yersiniabactin synthesis enzyme (Irp1; polyketide synthetase, Irp2), 2,3-dihydroxybenzoate-AMP ligase (EC 2.7.7.58) # Vulnibactin-specific                                                             | Amino Acids and Derivatives(Choline dehydrogenase (EC 1.1.99.1),Betaine aldehyde dehydrogenase (EC 1.2.1.8),BetI,BetT); FyuA precursor; hypothetical anthranilate synthase; hypothetical thioesterase; putative reductase component; hypothetical transcriptional regulator                                  |
| GI-79     | VCA0990-VCA0991 | 10,459          | -                                                                           | -                                                                                                                                                                                                                      | 2-dehydro-3-deoxyphosphogluconate aldolase (EC 4.1.2.14) / 4-Hydroxy-2-oxoglutarate aldolase (EC 4.1.3.16); Uronate isomerase (EC 5.3.1.12); D-mannonate oxidoreductase (EC 1.1.1.57); TRAP-type C4-dicarboxylate transport system; Uxu operon transcriptional regulator; Mannonate dehydratase (EC 4.2.1.8) |
| GI-85     | VC1854-VC1835   | 15,489          | -                                                                           | TolA, tolB protein precursor, Tol biopolymer transport system, TolR protein, MotA/TolQ/ExbB proton channel family protein, 4-hydroxybenzoyl-CoA thioesterase family active site, Predicted signal transduction protein | Cytochrome d ubiquinol oxidase subunit I/II; Holliday junction DNA helicase RuvAB; Crossover junction endodeoxyribonuclease ruvC (EC 3.1.22.4); CysteinyI-tRNA synthetase (EC 6.1.1.16); Peptidyl-prolyl cis-trans isomerase ppiB (EC 5.2.1.8); UDP-2,3-diacylglucosamine hydrolase (EC 3.6.1.-)             |
| GI-86     | VC1234-VC1235   | 5,574           | -                                                                           | -                                                                                                                                                                                                                      | hypothetical proteins                                                                                                                                                                                                                                                                                        |
| GI-87     | VC1451-VC1479   | 5,347           | -/-/Phage integrase / RstB phage-related integrase                          | -                                                                                                                                                                                                                      | FIG00072724: hypothetical protein, RstA phage-related replication protein                                                                                                                                                                                                                                    |
| GI-88     | VC1328-VC1329   | 3,431           | -                                                                           | Permease of the drug/metabolite transporter (DMT) superfamily, Membrane fusion component of tripartite multidrug resistance system                                                                                     | FIG01201931: hypothetical protein, Potassium channel protein/homology with <i>Vibrio vulnificus</i> YJ016 chr.1 and <i>Shewanella loihica</i> PV-4                                                                                                                                                           |
| GI-89     | VC2041-VC2042   | 2,899           | ISSod22C transposase OrfAB/COG2801: Transposase and inactivated derivatives | -                                                                                                                                                                                                                      | hypothetical proteins                                                                                                                                                                                                                                                                                        |
| GI-90     | VCA0249-VCA0250 | 3,164           | -                                                                           | -                                                                                                                                                                                                                      | probable transcriptional regulator; Pirin-like; Nicotinamidase family protein YcaC; Antibiotic biosynthesis monooxygenase                                                                                                                                                                                    |

Table S2: VNTR genotype of *V. cholerae* BJG-01. Allele number indicates the number of repeat units of each locus. The 11 repeat units of the MLVA loci are: AACAGA at VC0147, GACCTA at VC0436-7, 12 GATAATCCA at VC1650, TGCTGT at VCA0171, and ACCAGA at VCA0283.

| ID            | Origin         | Year        | Source   | Type               | VC0147    | VC0436-7* | VC1650   | VCA0171   | VCA0283   |
|---------------|----------------|-------------|----------|--------------------|-----------|-----------|----------|-----------|-----------|
| O395          | India          | 1965        | C        | O1 OGCL            | 7         | 4         | 3        | 24        | 14        |
| N16961        | Bangladesh     | 1975        | C        | O1 INET            | 9         | 7         | 7        | 23        | 14        |
| CIRS101       | Bangladesh     | 2002        | C        | O1 OGET            | 9         | 3         | 6        | 16        | 11        |
| CP1032        | Mexico         | 1991        | C        | O1 OGET            | 8         | 7         | 8        | 13        | 17        |
| CP1033        | Mexico         | 2000        | C        | O1 OGET            | 8         | 7         | 8        | 13        | 24        |
| CP1038        | Zimbabwe       | 2009        | C        | O1 OGET            | 8         | 3         | 3        | 18        | 22        |
| CP1041        | Zambia         | 2004        | C        | O1 OGET            | 8         | 7         | 6        | 9         | 10        |
| CP1042        | Thailand       | 2010        | C        | O1 OGET            | 9         | 6         | 7        | 17        | 17        |
| CP1048        | Bangladesh     | 2010        | C        | O1 OGET            | 9         | 3         | 6        | 22        | 17        |
| <b>BJG-01</b> | <b>MS, USA</b> | <b>2010</b> | <b>C</b> | <b>Non-O1/O139</b> | <b>12</b> | <b>12</b> | <b>5</b> | <b>10</b> | <b>NA</b> |
| HC-1A2        | Haiti          | 2010        | C        | Non-O1/O139        | 12        | 8         | 7        | 16        | NA        |
| HC-2A1        | Haiti          | 2010        | C        | Non-O1/O139        | 12        | 8         | 7        | 16        | NA        |
| HC-36A1       | Haiti          | 2010        | C        | Non-O1/O139        | 12        | 8         | 7        | 15        | NA        |
| HE-09         | Haiti          | 2010        | E        | Non-O1/O139        | 11        | 3         | 5        | 13        | NA        |
| HE39          | Haiti          | 2010        | E        | Non-O1/O139        | 8         | 3         | 2        | 13        | NA        |
| HE48          | Haiti          | 2010        | E        | Non-O1/O139        | 7         | 6         | 6        | 6         | NA        |

C: Clinical, E: Environmental, \*: Intergenic, NA; Not Applicable
